# Supplementary material for: Water Quality Indicators in Three Surface Hydraulic Connection Conditions in Tropical Floodplain Lakes
Source: MDPI journal article supplement (doi:10.3390/w14233931), 2022-12-02
Supplement: s1 [file s1]

## Water quality indicators in three surface hydraulic connection conditions in tropical floodplain lakes

Miguel Ángel Salcedo<sup>1</sup>, Allan Keith-Cruz Ramírez<sup>1</sup>, Alberto J. Sánchez<sup>1,\*</sup>, Nicolás Álvarez-Pliego<sup>1</sup>, Rosa Florido<sup>1</sup>, Violeta Ruiz-Carrera<sup>1</sup>, Sara Susana Morales-Cuetos<sup>1</sup>

<sup>1</sup> Diagnóstico y Manejo de Humedales Tropicales. Universidad Juárez Autónoma de Tabasco. División Académica de Ciencias Biológicas. Villahermosa, Tabasco, México.

\* Correspondence: alberthoj.sanchez@gmail.com

**Table S1.** Identification (ID) and location of the lakes and river on the Grijalva River plain. I = infrastructure, SHC = surface hydraulic connection, R = rural, U = urban.

| ID   | Lakes                        | Ubication<br>(degrees and minutes) | River             | I                                      | SHC       |
|------|------------------------------|------------------------------------|-------------------|----------------------------------------|-----------|
| IL1  | Las Ilusiones <sup>U</sup>   | 18°00'N; 92°55'W                   | Carrizal          | Embankments,<br>roads,<br>urbanization | Isolated  |
| IL2  | Loma de Caballo <sup>U</sup> | 17°58'N; 93°0'W                    | Carrizal          | Embankments,<br>roads,<br>urbanization | Isolated  |
| TCL3 | Playa del Pozo <sup>R</sup>  | 18°0'N; 92°47'W                    | Grijalva          | Embankments,<br>floodways, roads       | Temporal  |
| TCL4 | Maluco <sup>R</sup>          | 18°6'N; 92°45'W                    | Grijalva          | Embankments,<br>floodways, roads       | Temporal  |
| PCL5 | Manguito <sup>R</sup>        | 18°13'N; 92°50'W                   | Medellin-Gonzalez | Embankment,<br>road with bridge        | Permanent |
| PCL6 | Pucte <sup>R</sup>           | 18°14'N; 92°50'W                   | Medellin-Gonzalez | Embankment,<br>road with bridge        | Permanent |

**Table S2:** Physicochemical variables and chlorophyll-*a* in lakes under three surface hydraulic connection conditions (IL = isolated lakes, TCL = temporally connected lakes, PCL = permanently connected lakes) at four sampling times (T1: transition to low level, T2: low level, T3: transition to high level, T4: high level) throughout an annual cycle. Average values, standard deviation, minimum and maximum. Samples per connection type = 24 repetitions. SHC = surface hydraulic connection.

| SHC     | Variables<br>Time | Chl- <i>a</i><br>μg L <sup>-1</sup> | SD<br>m | TP<br>mg L <sup>-1</sup> | DOS<br>% | pH      | NO <sub>3</sub> <sup>-</sup><br>mg L <sup>-1</sup> | NH <sub>4</sub> <sup>+</sup><br>mg L <sup>-1</sup> | CE<br>μS cm <sup>-1</sup> | WL<br>m |
|---------|-------------------|-------------------------------------|---------|--------------------------|----------|---------|----------------------------------------------------|----------------------------------------------------|---------------------------|---------|
| IL      | T1                | 48.9±24                             | 0.5±0.2 | 0.80±0.23                | 60±37    | 8.1±1.1 | 11.05±5.88                                         | 1.72±0.67                                          | 345±112                   | 1.2±0.4 |
|         |                   | 20.1-74.1                           | 0.4-0.9 | 0.44-1.12                | 3-106    | 6.9-9.2 | 3.96-18.08                                         | 1.20-2.80                                          | 239-449                   | 0.9-2.0 |
|         | T2                | 53.7±23.5                           | 0.3±0.2 | 1.62±0.54                | 124±77   | 7.8±0.8 | 1.76±0.70                                          | 0.15±0.06                                          | 237±8                     | 0.9±0.5 |
|         |                   | 27.0-82.3                           | 0.2-0.5 | 0.88-2.16                | 50-220   | 7.1-8.8 | 0.73-2.63                                          | 0.09-0.25                                          | 225-249                   | 0.3-1.6 |
|         | T3                | 46.4±29.9                           | 0.3±0.0 | 1.84±0.94                | 69±55    | 7.9±0.7 | 3.47±1.64                                          | 1.12±0.22                                          | 320±70                    | 0.8±0.2 |
|         |                   | 16.2-76.1                           | 0.2-0.3 | 0.61-2.79                | 47-83    | 7.2-8.8 | 1.70-6.40                                          | 0.93-1.54                                          | 253-386                   | 0.6-1.1 |
|         | T4                | 32.3±6.4                            | 0.3±0.2 | 0.65±0.11                | 129±42   | 7.6±0.8 | 0.42±0.14                                          | 0.88±1.37                                          | 341±105                   | 1.4±0.4 |
|         |                   | 26.1-44.1                           | 0.2-0.6 | 0.49-0.78                | 87-187   | 6.7-8.6 | 0.08-1.04                                          | 0.03-3.21                                          | 240-443                   | 0.8-1.8 |
|         | Annual<br>IL1     | 63.8±17.2                           | 0.2±0.1 | 1.58±0.85                | 128±57   | 8.6±0.5 | 5.56±6.57                                          | 1.04±1.05                                          | 245±10                    | 1.1±0.4 |
|         | Annual<br>IL2     | 32.6-82.3                           | 0.2-0.4 | 0.64-2.79                | 47-220   | 7.8-9.2 | 0.36-18.08                                         | 0.04-3.21                                          | 225-263                   | 0.3-1.6 |
|         |                   | 26.9±6.4                            | 0.5±0.2 | 0.87±0.38                | 63±27    | 7.1±0.2 | 2.79±2.61                                          | 0.90±0.80                                          | 377±87                    | 1.1±0.5 |
|         | Annual<br>cycle   | 16.2-36.9                           | 0.3-0.9 | 0.44-1.70                | 3-108    | 6.7-7.4 | 0.08-7.66                                          | 0.03-2.29                                          | 238-449                   | 0.6-2.0 |
|         |                   | 45.3±22.7                           | 0.4±0.2 | 1.23±0.74                | 95±55    | 7.8±0.8 | 4.17±5.09                                          | 0.97±0.92                                          | 311±91                    | 1.1±0.4 |
| n=24    |                   | 16.2-82.3                           | 0.2-0.9 | 0.44-2.79                | 3-220    | 6.7-9.2 | 0.08-18.08                                         | 0.03-3.21                                          | 225-449                   | 0.3-2.0 |
| TCL     | T1                | 7.3±2.1                             | 0.8±0.4 | 0.55±0.12                | 37±38    | 6.7±0.4 | 10.04±8.09                                         | 0.81±0.13                                          | 274±99                    | 1.1±0.2 |
|         |                   | 5.1-9.8                             | 0.3-1.4 | 0.40-0.77                | 3-94     | 6.3-7.2 | 4.27-25.87                                         | 0.66-0.99                                          | 156-365                   | 0.9-1.3 |
|         | T2                | 27.1±11.6                           | 0.5±0.0 | 1.25±0.17                | 51±30    | 7.1±0.3 | 10.90±4.87                                         | 0.11±0.06                                          | 242±29                    | 0.7±0.2 |
|         |                   | 15.3-39.5                           | 0.5-0.6 | 0.96-1.44                | 24-105   | 6.9-7.6 | 6.68-20.35                                         | 0.04-0.18                                          | 213-288                   | 0.4-1.0 |
|         | T3                | 18.5±4.2                            | 0.4±0.1 | 0.79±0.19                | 34±29    | 7.2±0.6 | 1.62±0.49                                          | 0.49±0.07                                          | 358±23                    | 0.7±0.2 |
|         |                   | 12.6-22.6                           | 0.3-0.5 | 0.48-0.97                | 6-63     | 6.5-8.0 | 1.16-2.40                                          | 0.40-0.57                                          | 331-381                   | 0.5-0.9 |
|         | T4                | 15.4±9.4                            | 0.6±0.3 | 0.64±0.29                | 110±30   | 7.4±0.4 | 1.13±0.99                                          | 0.21±0.20                                          | 326±44                    | 1.3±0.6 |
|         |                   | 7.7-31.2                            | 0.3-0.9 | 0.32-0.99                | 75-155   | 6.8-8.0 | 0.30-2.40                                          | 0.11-0.48                                          | 283-376                   | 0.5-2.3 |
|         | Annual<br>TCL3    | 17.5±13.1                           | 0.6±0.4 | 0.76±0.41                | 80±33    | 7.4±0.4 | 4.65±4.14                                          | 0.35±0.28                                          | 343±48                    | 0.8±0.3 |
|         | Annual<br>TCL4    | 5.1-39.5                            | 0.2-1.4 | 0.32-1.44                | 44-155   | 6.8-8   | 0.30-10.78                                         | 0.04-0.79                                          | 252-381                   | 0.4-1.4 |
|         |                   | 16.7±7.0                            | 0.6±0.1 | 0.86±0.25                | 36±42    | 6.8±0.4 | 7.20±8.11                                          | 0.47±0.32                                          | 257±63                    | 1.1±0.5 |
|         | Annual<br>cycle   | 7.7-31.2                            | 0.4-0.8 | 0.40-1.28                | 3-123    | 6.3-7.6 | 0.36-25.87                                         | 0.11-0.99                                          | 156-347                   | 0.5-2.3 |
|         |                   | 17.1±10.3                           | 0.6±0.3 | 0.81±0.33                | 58±43    | 7.1±0.5 | 5.92±6.43                                          | 0.41±0.29                                          | 300±70                    | 1.0±0.4 |
| n=24    |                   | 5.1-39.5                            | 0.3-1.4 | 0.32-1.44                | 3-155    | 6.3-8.0 | 0.30-25.87                                         | 0.04-0.99                                          | 156-381                   | 0.4-2.3 |
| PCL     | T1                | 7.6±3.1                             | 1.3±0.5 | 1.18±0.57                | 110±24   | 7.6±0.4 | 7.69±3.12                                          | 1.33±0.76                                          | 449±45                    | 1.0±0.1 |
|         |                   | 4.5-10.7                            | 0.8-1.9 | 0.36-1.80                | 85-148   | 7.2-8.2 | 2.32-11.97                                         | 0.59-2.18                                          | 395-494                   | 0.9-1.2 |
|         | T2                | 7.4±3.5                             | 0.9±0.4 | 0.86±0.27                | 110±24   | 7.6±0.4 | 1.01±0.61                                          | 0.07±0.01                                          | 449±45                    | 0.9±0.2 |
|         |                   | 3.8-12.4                            | 0.5-1.4 | 0.68-1.40                | 85-148   | 7.2-8.2 | 0.49-2.02                                          | 0.05-0.08                                          | 395-494                   | 0.7-1.1 |
|         | T3                | 3.2±0.8                             | 1.3±0.6 | 0.55±0.13                | 34±29    | 7.2±0.6 | 2.16±0.31                                          | 0.39±0.04                                          | 358±23                    | 0.8±0.1 |
|         |                   | 2.3-4.1                             | 0.7-2.1 | 0.36-0.73                | 6-63     | 6.5-8.0 | 1.64-2.50                                          | 0.31-0.43                                          | 331-381                   | 0.7-1.0 |
|         | T4                | 8.9±3.6                             | 0.8±0.2 | 0.48±0.11                | 160±24   | 7.7±0.3 | 0.31±0.25                                          | 0.13±0.18                                          | 390±6                     | 1.2±0.3 |
|         |                   | 4.6-12.3                            | 0.4-1.0 | 0.34-0.62                | 132-184  | 7.4-8.0 | 0.06-0.62                                          | 0.03-0.49                                          | 379-394                   | 0-1.7   |
|         | Annual<br>PCL5    | 9.1±3.5                             | 0.7±0.2 | 0.89±0.45                | 82±41    | 7.4±0.3 | 2.68±3.16                                          | 0.35±0.28                                          | 360±103                   | 0.9±0.1 |
|         | Annual<br>PCL6    | 2.9-12.4                            | 0.4-1.0 | 0.53-1.80                | 30-145   | 6.9-7.9 | 0.14-8.27                                          | 0.03-2.18                                          | 212-494                   | 0.7-1.0 |
|         |                   | 4.5±1.5                             | 1.4±0.4 | 0.64±0.36                | 130±48   | 8.0±0.2 | 2.90±3.61                                          | 0.47±0.32                                          | 356±49                    | 1.1±0.3 |
|         | Annual<br>cycle   | 2.3-7.7                             | 0.9-2.1 | 0.34-1.40                | 56-184   | 7.5-8.4 | 0.06-11.97                                         | 0.05-0.68                                          | 282-424                   | 0.7-1.7 |
|         |                   | 6.8±3.5                             | 1.1±0.5 | 0.77±0.42                | 106±50   | 7.7±0.4 | 2.79±3.32                                          | 0.48±0.63                                          | 358±79                    | 1.0±0.2 |
| n=24    |                   | 2.3-12.4                            | 0.4-2.1 | 0.34-1.80                | 30-184   | 6.9-8.4 | 0.06-11.97                                         | 0.03-2.18                                          | 212-494                   | 0.7-1.7 |
| General |                   | 23.0±21.8                           | 0.7±0.4 | 0.93±0.56                | 87±53    | 7.5±0.7 | 4.30±5.20                                          | 0.62±0.71                                          | 323±83                    | 1.0±0.4 |
|         |                   | 2.3-82.3                            | 0.2-2.1 | 0.32-2.79                | 3-220    | 6.3-9.2 | 0.06-25.87                                         | 0.03-3.21                                          | 156-449                   | 0.3-2.3 |
